1 **Genomic epidemiology of *Mycobacterium bovis* infection in sympatric badger**  
2 **and cattle populations in Northern Ireland.**

3 Assel Akhmetova<sup>1</sup>, Jimena Guerrero<sup>2</sup>, Paul McAdam<sup>3</sup>, Liliana C.M. Salvador<sup>4</sup>, Joseph Crispell<sup>5</sup>, John  
4 Lavery<sup>6</sup>, Eleanor Presho<sup>6</sup>, Rowland R. Kao<sup>7</sup>, Roman Biek<sup>1</sup>, Fraser Menzies<sup>8</sup>, Nigel Trimble<sup>8</sup>, Roland  
5 Harwood<sup>8</sup>, P. Theo Pepler<sup>1</sup>, Katarina Oravcova<sup>1</sup>, Jordon Graham<sup>6</sup>, Robin Skuce<sup>6</sup>, Louis du Plessis<sup>9</sup>,  
6 Suzan Thompson<sup>6</sup>, Lorraine Wright<sup>6</sup>, Andrew Byrne<sup>10</sup>, Adrian R. Allen<sup>6</sup>.

7 1 - University of Glasgow, Glasgow, UK.

8 2 - Centro de Investigacion en Alimentacion y Desarrollo A.C., Hermosillo, Sonora, Mexico

9 3 – Fios Genomics, Edinburgh, UK.

10 4 – Department of Infectious Diseases, College of Veterinary Medicine, University of Georgia, Athens,  
11 GA, USA.

12 5 – Foreign, Commonwealth and Development Office, Glasgow, UK.

13 6 - Agri-Food and Biosciences Institute, AFBI Stormont, Belfast, UK.

14 7 – University of Edinburgh, Roslin Institute, Edinburgh, UK

15 8 – Department of Agriculture, Environment and Rural Affairs (DAERA), Belfast, UK.

16 9 – Department of Zoology, University of Oxford, Oxford, UK

17 10 –Department of Agriculture Food and the Marine (DAFM),Dublin, Ireland.

18

19

20

21

22

23

24

25

26

27

28

29

30

31

32

33  
34  
35  
36  
37  
38  
39  
40  
41  
42  
43  
44  
45  
46  
47  
48  
49  
50  
51  
52  
53  
54  
55  
56  
57  
58  
59  
60  
61  
62  
63  
64  
65  
66  
67  
68

## **Abstract**

### **Background**

Bovine tuberculosis (bTB) is a costly epidemiologically complex, multi-host, endemic disease. Lack of understanding of transmission dynamics may undermine eradication efforts. Pathogen whole genome sequencing improves epidemiological inferences, providing a means to determine the relative importance of inter- and intra- species host transmission for disease persistence. We sequenced an exceptional data set of 619 *Mycobacterium bovis* isolates from badgers and cattle in a 100km<sup>2</sup> bTB ‘hotspot’ in Northern Ireland. Historical molecular subtyping data permitted the targeting of an endemic pathogen lineage, whose long-term persistence provided a unique opportunity to study disease transmission dynamics in unparalleled detail. Additionally, to assess whether badger population genetic structure was associated with the spatial distribution of pathogen genetic diversity, we microsatellite genotyped hair samples from 769 badgers trapped in this area.

### **Results**

Graph transmission tree methods and structured coalescent analyses indicated the majority of bacterial diversity was found in the local cattle population. Results pointed to transmission from cattle to badger being more common than badger to cattle. Furthermore, the presence of significant badger population genetic structure in the landscape was not associated with the spatial distribution of *M. bovis* genetic diversity, suggesting that badger-to-badger transmission may not be a key determinant of disease persistence.

### **Significance**

Our data were consistent with badgers playing a smaller role in the maintenance of *M. bovis* infection in this study site, compared to cattle. Comparison to other areas suggests that *M. bovis* transmission dynamics are likely to be context dependent, and the role of wildlife difficult to generalise.

## 69 1. Introduction.

70 *Mycobacterium bovis* infection in cattle (*Bos taurus*) and badgers (*Meles meles*) is a persistent and  
71 costly problem for the farming industries and governments of the United Kingdom and Republic of  
72 Ireland (Allen et al. 2018). In Northern Ireland alone, the bovine tuberculosis (bTB) eradication scheme  
73 cost £44 million in 2017/2018 (Northern Ireland Audit Office, 2018). The complex epidemiology of the  
74 disease is well recognised, with the role of wildlife in transmitting infection to cattle acknowledged as  
75 an impediment to eradication (Godfray et al. 2018). A major knowledge gap for this disease has been,  
76 until recently, a detailed understanding of inter-host transmission dynamics and their relative  
77 importance (Kao et al. 2016).

78 Multi-host zoonotic infections of slowly-evolving pathogens, such as the members of the *M.*  
79 *tuberculosis* complex (MTBC), present significant challenges to researchers who wish to use molecular  
80 epidemiological methods to understand disease transmission dynamics (Biek et al. 2015). Previously,  
81 multi-locus variable number of tandem repeats analysis (MLVA) and spoligotyping were used to  
82 characterise spatio-temporal patterns in bTB epidemiology (Kamerbeek et al. 1997; Skuce et al. 2010;  
83 Milne et al. 2019; Skuce et al. 2020). These methods have demonstrated how *M. bovis* infections  
84 typically present as a series of geographically localised micro-epidemics (Skuce et al. 2010; Skuce et  
85 al. 2020). However, MLVA and spoligotype loci, whilst extremely useful in defining the home ranges  
86 of endemic infections (Trewby, 2016a; Milne et al. 2018), evolve at rates considerably slower than the  
87 inter-host transmission rate, thereby limiting their utility for contemporary disease outbreak  
88 investigations (Meehan et al. 2018).

89 Whole Genome Sequencing (WGS) technologies and associated phylogenetic analytical frameworks,  
90 have helped to reveal sources of infection and to improve surveillance and control for various  
91 pathogens (Harris et al. 2013; Mellman et al. 2011; Walker et al. 2013). These phylodynamic methods  
92 have been most effectively applied to fast-evolving viral pathogens, whose mutation rates can, with  
93 dense sampling, permit inference of fine scale disease dynamics, over short time intervals (Volz et al.  
94 2009; Biek et al. 2015). While the latter degree of resolution may be unobtainable for slowly evolving  
95 bacterial pathogens, recently it has been shown that provided dense sampling is undertaken across a  
96 wide temporal window, much can be revealed about inter-host disease transmission dynamics of bTB  
97 (Biek et al. 2012; Crispell et al. 2017; Salvador et al. 2019, Crispell et al. 2019; Rossi et al. 2020a and  
98 2020b).

99 Biek et al (2012) were the first to apply WGS and Bayesian phylogenetics to the *M. bovis* epi-system,  
100 focusing on an emerging endemic strain found in the east of Northern Ireland. In this proof of concept  
101 study, they demonstrated ongoing transmission between sympatric cattle and badgers at the farm  
102 scale. However, due to the small number of samples and the fact that these samples were not strictly  
103 contemporaneous, it was difficult to infer which inter-host transmission rates were most important.  
104 Subsequent work in New Zealand, applied to *M. bovis* isolates from cattle and brushtail possums  
105 (*Trichorus vulpecula*), revealed that the possum population was likely the major reservoir and the  
106 primary driver for infection in cattle (Crispell et al. 2017). However, the study also revealed that biases  
107 in sampling structure could affect inferences of the relative importance of transmission routes  
108 whenever discrete traits analyses were used. More recently, Salvador et al. (2019) used WGS and  
109 Bayesian phylogenetic methods to clarify the roles that cattle, white tailed deer (*Odocoileus*  
110 *virginianus*) and elk (*Cervus canadensis*) play in the epidemiology of an endemic *M. bovis* problem in  
111 Michigan, USA. Elk and cattle infections were observed to cluster in space, leading to concerns that  
112 the wide-ranging behaviour of elk could be a risk for disease spread across the landscape. However,  
113 phylogenetic data clarified that deer were the primary source of inter-species transmission in the

114 region. In the UK, a recent study from Woodchester Park in Gloucestershire has shown that badger  
115 and cattle intra-species transmission accounts for the majority of disease dissemination events  
116 (Crispell et al. 2019). However, Bayesian structured coalescent methods show that badger-to-cattle  
117 transmission occurred up to nine times more commonly than cattle-to-badger transmission in this  
118 dataset, further clarifying the role that wildlife can play in maintaining livestock infections in this epi-  
119 system (Crispell et al. 2019). In Ireland, phylogenetic methods were recently used to show that in  
120 County Wicklow, local deer populations harbour a diversity of *M. bovis* consistent with them being a  
121 source of infection for cattle (Crispell et al. 2020).

122 Pathogen spread across landscapes is recognised to be an inherently spatial process (Biek and Real,  
123 2010), leading to distinct patterns in pathogen genetic structure. Similarly, free ranging wildlife hosts,  
124 exhibit partitioning of their own genetic variation across landscapes (Guerrero et al. 2018), for  
125 example, isolation by distance (IBD) (Wright, 1943). An appreciation of how these types of landscape-  
126 genetic phenomena intersect can help to inform epidemiological investigations in wildlife populations  
127 (Biek and Real, 2010). A key question within localised bTB micro-epidemics is whether significant  
128 badger population structure is observed over smaller geographic scales in Ireland, and if so, whether  
129 it explains any of the partitioning of *M. bovis* genetic variation in the landscape.

130 In this study we sought to better understand the interspecies transmission dynamics of *M. bovis* and  
131 the effect of badger population structure on the spatial partitioning of pathogen diversity. Compared  
132 to some previous studies, we undertook a systematic, sympatric sampling of both cattle and badgers.  
133 The study was conducted in a small 100 km<sup>2</sup> area of Northern Ireland (Figure 1A), using data from a  
134 recently completed (2014-2018) wildlife intervention. The ‘test and vaccinate or remove’ (TVR)  
135 selective culling protocol applied to the local badger population (Arnold et al. 2021; Menzies et al.  
136 2021) provided an important opportunity to systematically sample sympatric cattle and badger  
137 populations for *M. bovis*, and to apply WGS, phylodynamic and population genetic methods to  
138 determine the roles that both cattle and badgers play in the local disease dynamics.

139

## 140 **2. Methods.**

### 141 **2.1 Sampling of cattle and badgers.**

142 The TVR zone (Figure 1A), was chosen because it has a high prevalence of cattle TB (24% confirmed  
143 bTB herd prevalence over two years [2011/2012]), and is embedded within County Down, which also  
144 has one of the highest average badger densities (3.88 badgers per km<sup>2</sup>) in Northern Ireland – (Reid et  
145 al. 2012).

146 An initial survey was conducted in 2014 to establish sett locations (DAERA, 2018). Overnight cage  
147 trapping was used across all years between the months of May and October 2014-2018. Trapped  
148 badgers were anaesthetised, trap-side, hair sampled and tested for *M. bovis* infection using the dual  
149 path platform (DPP) serology test based on the StatPak method (Chambers et al. 2009). Tracheal  
150 aspirate was taken from all trapped badgers, whether DPP-positive or -negative and sent for  
151 bacteriological culture as described below. From 2015-2018, DPP positive badgers were humanely  
152 euthanized and DPP-negative badgers were vaccinated using injectable Bacillus Calmette Guerin  
153 (BCG), and released (Menzies et al. 2021). Culled badgers underwent post-mortem examination  
154 according to a standardised protocol (Courcier et al. 2020) and specified tissues were submitted for  
155 bacteriological culture.

156 All cattle in Northern Ireland are TB tested annually using the standardised (European Council, 1964)  
157 single intradermal comparable cervical tuberculin (SICCT) test (Abernethy et al. 2006). Specified tissue

158 from all SICCT positive bTB reactor cattle in the TVR region from 2014-2017 were harvested at the  
159 time of slaughter and submitted for bacteriological culture.

160 To provide extra temporal depth, a selection of historical isolates (n=243) from both hosts in the TVR  
161 zone were re-cultured from the AFBI *M. bovis* Northern Ireland wide, strain archive. The temporal  
162 window for all isolates runs from 1986 to 2017. All historical badger isolates were derived from road  
163 traffic accident (RTA) post-mortems in a surveillance scheme run by the Department of Agriculture,  
164 Environment and Rural Affairs in Northern Ireland (DAERA-NI) (Courcier et al. 2017). In addition, an  
165 area directly neighbouring the study zone has a distinct lineage of *M. bovis* present, four isolates of  
166 which were detected in the study zone. A random sample of historical isolates from this neighbouring  
167 area was collected to provide additional phylogenetic context.

## 168 **2.2 *M. bovis* culture and genomic DNA extraction.**

169 *M. bovis* isolates were initially cultured in the liquid BD BACTEC MGIT system, solid Stonebrinks and  
170 Löwenstein-Jensen media and single colonies were selected for sub-culture (Skuce et al. 2005).  
171 Isolates were heat-killed in a water bath at 80°C for 30 min. DNA was extracted using standard high  
172 salt/cationic detergent cetyl hexadecyl trimethyl ammonium bromide (CTAB) and solvent extraction  
173 protocols (Parish and Stoker, 2001; van Sooling et al. 2002).

## 174 **2.3 Spoligotyping and MLVA analysis.**

175 *M. bovis* isolates were genotyped by spoligotyping (Kamerbeek et al., 1997) and 8 locus MLVA using  
176 previously described methods (Skuce et al., 2010). Authoritative names for spoligotype patterns were  
177 obtained from [www.mbovis.org](http://www.mbovis.org) (Smith and Upton, 2012). MLVA profiles were named using a  
178 laboratory nomenclature (Skuce et al. 2005).

## 179 **2.4 Genome sequencing and bioinformatic analyses.**

180 Sequencing libraries were prepared using the Illumina Nextera XT method to produce inserts of  
181 approximately 500-600bp. One hundred samples were sequenced at AFBI using an Illumina MiSeq  
182 platform with Illumina V2 chemistry, producing paired-end reads of 250 bp. A further 100 samples  
183 were sequenced at the Glasgow Polyomics facility using an Illumina MiSeq producing 2x300 bp paired  
184 end reads. All remaining samples were sequenced by Eurofins Scientific using an Illumina HiSeq  
185 producing 2 x250 bp paired end reads. For quality assurance (QA) purposes, comparison of sequencing  
186 performance across all three sites was undertaken at AFBI. Specifically, we re-sequenced 15 randomly  
187 selected isolates from those sent to other institutes and compared these duplicates to the initial  
188 sequencing data.

189 Reads for each sample were mapped to the recently updated/annotated (Malone et al. 2017)  
190 reference genome for *M. bovis* strain AF2122/97 (GenBank accession [LT708304.1](https://www.ncbi.nlm.nih.gov/nuccore/LT708304.1)) using the mapping-  
191 based phylogenomics pipeline, RedDog V1beta.10.3 (Edwards et al. 2016) to identify SNP variants  
192 across all isolates. Alignment and mapping were carried out in Bowtie2 v2.2.9 (Langmead et al. 2012)  
193 using the sensitive local mapping setting. SNP calling was undertaken using SAMtools and BCFtools (Li  
194 et al. 2009) using the consensus caller setting. A minimum depth of 10x was set for SNP calling. The  
195 average coverage failure filter, average depth filter and average mapping failure filters were set at  
196 98%, 10x, and 75% respectively. Transposable elements, repeat regions and the PE/PPE regions as  
197 defined in the Genbank annotation, were excluded from SNP calling using the parseSNP tool in the  
198 RedDog pipeline (Edwards et al. 2016).

199 Some isolates were sequenced by Glasgow Polyomics, others were sequenced by Eurofins  
200 laboratories. 15 randomly selected isolates were re-sequenced by AFBI. No SNP distance was observed  
201 between duplicates and the previously sequenced isolates.

## 202 **2.5 Badger microsatellite genotyping.**

203 Nuclear DNA extracted from all badger hair samples was genotyped at 14 microsatellite loci using  
204 methods previously described (Guerrero et al. 2018). We re-profiled 5% of DNA samples as a quality  
205 assurance measure.

## 206 **2.6 Testing for IBD in badger population.**

207 Using the package ‘PopGenReport’ (Adamack and Gruber, 2014) in R (R Development Core Team,  
208 2020), we constructed a microsatellite distance matrix (Smouse and Peakall method) for all unique  
209 badgers captured in the study zone, and for the subset of badgers that produced *M. bovis* cultures  
210 from the endemic lineage (see below), to ensure we had sufficient power to detect IBD in sub-  
211 populations. For both datasets, we then constructed inter-animal Euclidean distance matrices using  
212 the R package, ‘Geosphere’ (Hijmans et al. 2019). We then performed a Mantel test, with 10,000  
213 repetitions, for IBD using the package ‘ade4’ (Dray and Dufour, 2007) in R. For the larger meta-  
214 population, Mantel tests and linear regressions were carried out for each capture year, with an  
215 analysis of covariance carried out to compare the slopes of each genetic distance vs euclidean distance  
216 relationship.

## 217 **2.7 Preliminary phylogenetic analyses.**

218 The most appropriate nucleotide substitution model for our phylogenetic analyses of the FASTA  
219 alignments of informative SNPs was assessed using the ‘modelTest’ function of the package  
220 ‘Phangorn’ (Schliep, 2011) in R. Specifically, the fit of the General Time Reversible (GTR), Jukes Cantor,  
221 and Hasegawa Kishino Yano (HKY) models to the data were assessed. The nucleotide substitution  
222 model with the lowest AIC (GTR – AIC: 26860.39) was used to build a maximum likelihood phylogeny  
223 using RAxML v8 (Stamatakis, 2014). The rapid bootstrapping search method in RAxML was selected and  
224 stopped after 400 replicates. The phylogeny was visualized and assessed in FigTree v1.4.4 (Rambaut,  
225 2018) and the ape package (Paradis and Schliep, 2018) in R. Final figures of maximum likelihood trees  
226 were produced using ggtree (Yu, 2020). The presence/absence of a temporal signal in the phylogenetic  
227 data of the endemic clade was assessed using the program TempEst v1.5.1 (Rambaut *et al.* 2016).  
228 After selecting the reference strain (AF2122/97) as the best-fitting, outgroup root isolate, which  
229 maximises the temporal signal, the root to tip divergence model was fitted using the residual mean  
230 squared method.

231 To test the significance of the temporal signal in our dataset, we randomised the tip dates for the 302  
232 chosen isolates from the endemic clade, in ten replicate analyses, as *per* Firth et al (2010). Tip dates  
233 were randomised using the ‘Tidatingbeast’ package (Rieux and Khatchikian, 2017) in R. The original  
234 dataset and each replicate were subjected to a simplified BEAST 2 (Bayesian Evolutionary Analysis by  
235 Sampling Trees - Bouckaert et al. 2014), constant population, unstructured coalescent analysis, using  
236 a relaxed clock model, the GTR nucleotide substitution model and a chain length of 200,000,000  
237 MCMC steps, of which 10% was discarded as burn-in. After checking convergence in Tracer 1.7.1 –  
238 (ESS > 200 for all parameters), the median substitution rate for each replicate was compared to those  
239 of the non-randomised data set. In addition, we also compared the substitution rates to those inferred  
240 from the BASTA and MASCOT analyses (see below) to verify that not taking population structure into  
241 account did not result in biased clock rate estimates.

242

## 243 **2.8 Structured coalescent analyses to determine inter-species *M. bovis* transition rates.**

244 To facilitate the goal of determining the transmission dynamics of bTB in the TVR zone, existing  
245 spoligotyping and MLVA data were used to rationally target the historically endemic strain family in  
246 this region (Skuce et al. 2010; Skuce et al. 2020). Specifically, we applied two Bayesian structured  
247 coalescent methods, using BEAST2 (Bouckaert et al. 2014; Barrido-Sottani et al. 2017). Specifically, we  
248 used BASTA (DeMaio et al. 2015) (Bayesian Structured Coalescent Approximation - De Maio et al.  
249 2015) and MASCOT (Marginal Approximation of the Structured Coalescent - Müller et al. 2018)) which  
250 can estimate both ancestral population structure and transition rates in the presence of biased  
251 sampling. To ensure valid comparisons with previously investigated bTB epi-systems in the UK, we  
252 used BASTA as *per* Crispell et al (2019) and Rossi et al (2020a and 2020b). In addition, we used MASCOT  
253 to estimate the effective population size / diversity of the *M. bovis* population in both cattle and  
254 badger hosts.

255 Our study population for estimation of transition rates, was a subset of 302 isolates from the endemic  
256 lineage defined below. We randomly selected 248 cattle isolates (one isolate per annum per herd)  
257 and 54 isolates from unique badgers. All 302 isolates were collected in the period 1986-2017. We  
258 implemented BASTA and MASCOT analyses in BEAST2 to determine inter-species transition rates. We  
259 used uncorrelated lognormally distributed relaxed clock models, as these have been observed to best  
260 describe the rates of molecular evolution in *M. tuberculosis* and *M. bovis* in previous studies (Crispell  
261 et al. 2017; Crispell et al. 2019; Menardo et al. 2019). Each BASTA and MASCOT analysis was run with  
262 three replicates. For each BASTA analysis, a chain length of 300,000,000 MCMC steps was set,  
263 sampling every 15,000 steps. For each MASCOT analysis, a chain length of 500,000,000 MCMC steps  
264 was set, sampling every 50,000 steps. Full details of analyses are supplied in the xml files in  
265 Supplementary files. Following the removal of a 10% burn-in, chains were combined using  
266 LogCombiner v2.6 (Bouckaert et al. 2014) and analyses were compared based upon the log likelihood  
267 scores, model convergence and posterior support of parameters in Tracer v1.7.1 (Rambaut et al.  
268 2018). Maximum Clade Credibility (MCC) trees were constructed for combined chains using  
269 TreeAnnotator v2.6 (Bouckaert et al. 2014)) using the median ancestor heights criterion. BASTA log  
270 and tree output files were used to estimate inter-species transition rates and inter- and intra-species  
271 transition counts, using custom R and Java scripts which analysed 10,000 trees from each of the model  
272 runs as per the method of Crispell et al (2019) – these scripts are provided as Supplementary files.

## 273 **2.9 Graph methods to assess inter-species transitions.**

274 To reconstruct the transmission tree of the set of 302 *M. bovis* isolates collected from badgers  
275 and cattle between 1986 and 2017, we used the graph method *SeqTrack* (Jombart et al.,  
276 2011). *SeqTrack* infers the most likely genealogy from genomic and temporal data. The matrix  
277 of pairwise genetic distances between *M. bovis* isolates, the isolates' date of collection and  
278 associated host information, an estimated *M. bovis* substitution rate, and the sequences total  
279 (in number of SNPs) were given as input. *SeqTrack* produced a *M. bovis* genealogy tree, with  
280 the number of SNP differences associated to the branch between each ancestor and  
281 descendant. The output files were used to compute the distribution of *M. bovis* genetic  
282 distances between ancestors and descendants, as well as the percentage of intra and inter  
283 species transmission events. To check the effect of *M. bovis* substitution rates on the ancestral  
284 history, we ran the analysis with values from previous *M. bovis* genomic studies in NI (0.15  
285 and 0.20 substitutions per genome per year from Biek et al. 2012 and Trewby et al. 2016b,

286 respectively, and 0.35 from this work (Section 3.5). *SeqTrack* was implemented in R using the  
287 adegenet package (Jombart and Ahmed, 2011) (scripts provided as Supplementary files).

## 288 **2.10 Assessing effect of badger population structure on *M. bovis* spatial partitioning.**

289 We sought to determine if *M. bovis* inter-isolate SNP distance is associated with pairwise Euclidean  
290 distance between trapped badger locations, pairwise difference in time of *M. bovis* isolation and  
291 pairwise host genetic distance. For *M. bovis* genome sequences derived from badgers infected with  
292 the endemic lineage, we constructed two inter-isolate distance matrices: (i) SNP distance using the R  
293 package 'ape' (Paradis and Schliep, 2018); (ii) time of isolation difference using the 'dist' function in R.

294 Using these *M. bovis* distance matrices and the two already produced to assess IBD in the infected  
295 badgers (see above), we performed a multiple regression on distance matrices (MRM) analysis using  
296 the R package 'ecodist' (Goslee and Urban, 2007) with 10000 repetitions.

## 297 **3. Results**

### 298 **3.1 Sampling of cattle and badgers.**

299 A total of 642 *M. bovis* isolates were used in this study, of which 611 were collected from badgers and  
300 cattle in the TVR zone, and 31 from a neighbouring region. Of the 642 isolates, 15 were sequencing  
301 QA duplicate controls as discussed in section 2.4. In addition, we re-sequenced the *M. bovis* reference  
302 sample, AF2122/97 as an internal control. Of the 642 survey isolates, 399 (282 cattle; 117 badger)  
303 were sampled contemporaneously in the TVR zone during the project (2014-2017). A further 242  
304 historical isolates (232 cattle; 10 badger=10) from 1986-2013 were available from archived cultures  
305 from the zone and its environs. Cattle isolates across all years were single isolates per animal from 185  
306 herds. Multiple isolates (n=86) were cultured from 24 individual badgers, with single isolates derived  
307 from a further 36 badgers. In total, between 1986 and 2017, we collected *M. bovis* isolates from 60  
308 unique badgers and 483 unique cattle (Figure 1B). Full details of sample locations, year of isolation  
309 and species of origin are given in Supplementary Data 1.

### 310 **3.2 Spoligotyping and MLVA analysis.**

311 22 MLVA types and 6 spoligotypes were observed in the 642 isolates. From prior analyses (Skuce et  
312 al. 2010), the spoligotype and MLVA genotypes could be grouped into eight related 'strain families'.  
313 Each is dominated by a probable founder genotype (source of the family name) with related daughter  
314 strains varying by spoligotype and / or MLVA polymorphism. Numbers of isolates per strain family are  
315 shown in Table 1A. The MLVA 6, spoligotype 263 family (6.263) was considered to be endemic in the  
316 region and accounted for most of the observed isolates (Skuce et al. 2010; Skuce et al. 2019). The  
317 remaining seven strain families (1.140, 2.142, 3.140, 4.140, 5.140, 19.140 and 20.131) were not likely  
318 to be endemic in the TVR cull zone as each has a home range elsewhere in Northern Ireland (Skuce et  
319 al. 2010; Trewby, 2016a). Of the 36 isolates from strain family 20.131, 32 were collected from a region  
320 neighbouring the TVR zone, 4 badger isolates were found within the zone. Full details of isolate MLVA  
321 genotypes and spoligotypes are supplied in Supplementary Data 1.

### 322 **3.3 Sequencing, bioinformatic analyses and Quality Assurance.**

323 The RedDog pipeline was used to process the isolates. 24 (22 cattle and 2 badgers) failed the  
324 sequencing QA filters (98% coverage filter for the reference genome) and were excluded. The  
325 remaining 618 survey isolates plus AF2122/97 control passed all QA filters. Detailed QA meta-data for  
326 all 619 isolates are given in Supplementary Data 2. Forward and reverse reads for all QA passing



327 isolates are deposited at the National Centre for Biotechnology Information (NCBI) Sequence Read  
328 Archive (SRA), bio-project XXXXXXXX. Accession numbers for all reads are given in Supplementary Data  
329 2.

330 From the 619 isolates with good quality sequence reads, 1562 SNPs passed QA calling rules and were  
331 used to conduct phylogenetic analyses. Details of all SNPs passing QA, and their location in the  
332 reference sequence are given in Supplementary Data 3.

333 The AF2122/97 control exhibited a 3 SNP distance from the reference sequence (Genbank [LT708304.1](#))  
334 likely due to accrual of mutations after culture passages at AFBI.

### 335 **3.4 Badger microsatellite genotyping and IBD analyses.**

336 769 unique badgers were captured, location recorded, sampled and successfully genotyped between  
337 2014 and 2018. Random 5% re-genotyping for QA purposes produced identical allele calls.  
338 Microsatellite profiles, capture locations and date of capture can be found in Supplementary Data 4.  
339 Summary population genetic statistics for all animals, per year are collated in Supplementary Table  
340 S1.

341 Samples from 45 badgers produced positive *M. bovis* cultures. Spoligotyping and MLVA placed them  
342 in the major endemic lineage in the study zone. Capture locations for the 45 endemic strain positive  
343 badgers are illustrated in Supplementary Figure S1A.

344 Across all years, the badger population exhibited consistent levels of IBD, as indicated by significant  
345 Mantel tests ( $r=0.11-0.17$ ,  $p<0.05$ ) (Table 2). The slopes of the relationships between genetic distance  
346 and Euclidean distance were very similar. Small, significant differences were observed in the ANCOVA  
347 (Supplementary Figure S2 and Table 2), mainly due to the increased slope of the IBD relationships  
348 years 2015, 2016, and 2018, consistent with badger genetic differentiation being observed over  
349 shorter distances.

350 The 45 *M. bovis* culture positive badgers also exhibited significant IBD (Table 2) similar to that of the  
351 larger study population.

### 352 **3.5 Preliminary phylogenetic analyses.**

#### 353 **3.5.1. All isolates.**

354 The Maximum Likelihood tree constructed in RAxML for all 619 sequenced isolates is shown in Figure  
355 2. The phylogeny was rooted using the 20.131 strain family as an out-group, as these isolates are  
356 known to derive from an older common ancestor than other extant strains (Allen et al. 2013). Eight  
357 major lineages, each with high bootstrap support, were observed in the phylogeny. The eight strain  
358 families defined previously by MLVA and spoligotyping were monophyletic and in perfect concordance  
359 with the SNP based tree topology. We determined the within-lineage diversity, as defined by total  
360 number of SNPs recorded, for each of the eight major lineages observed (Table 1B). Additionally, from  
361 distance matrices generated during phylogenetic analyses, pairwise, inter-isolate SNP distance,  
362 summary statistics were computed within all eight major lineages (Table 1C).

#### 363 **3.5.2 Endemic lineage – 6.263.**

364 The endemic major lineage of 6.263 presented the best opportunity to investigate *M. bovis*  
365 transmission dynamics among cattle and badgers in the TVR zone. 6.263 has been consistently  
366 associated with the study area for over two decades in local cattle and badgers, unlike lineages whose  
367 home range is elsewhere in Northern Ireland (Skuce et al. 2020). A higher resolution SNP phylogeny  
368 of 6.263 is shown in Figure 3, using the subset of 302 isolates described above. Cattle and badger

369 isolates were observed in all sub-lineages of the endemic lineage, with no sub-lineages made up of  
370 isolates exclusively from a single host species. Major sub-lineages had good bootstrap support (>90).  
371 A bar-plot showing frequency of isolates per host species taken from the endemic clade over the  
372 period 1986-2017, is presented in Supplementary Figure S3. A smaller maximum likelihood phylogeny  
373 of the 45 endemic clade badgers is presented in Supplementary Figure S1B.

374 Badger isolates were predominantly found in the endemic 6.263 lineage. No badger isolates were  
375 found in the 1.140, 2.142, 3.140, 5.140 and 19.140 lineages. Four isolates, from two unique badgers,  
376 sampled in the TVR zone, were found in the 20.131 lineage, whilst five isolates from four unique  
377 badgers were found in the 4.140 lineage (Supplementary Figures S4 and S5). A full breakdown of  
378 number of isolates from each species in each lineage is shown in Table 1A.

379 The n=302 endemic lineage phylogeny analysed in TempEst, rooted against the AF2122/97 reference  
380 genome, exhibited a positive correlation between genetic divergence (root to tip distance) and  
381 sampling time, with moderate evidence of temporal signal ( $R^2=0.25$ ;  $p<0.001$ ), and a conservative  
382 clock rate of approximately 0.22 substitutions per genome, per year - see Supplementary Figure S6A.  
383 All ten tip date randomised replicate datasets run using the simple unstructured coalescent model,  
384 exhibited similar substitution rates, all of which were considerably lower than the substitution rate  
385 inferred on the non-randomised data set (0.35 substitutions per genome, per year 95% HPD: 0.28-  
386 0.43) and exhibited no overlap in 95% highest posterior density (HPD) (Supplementary figure S6B).  
387 Furthermore, the BASTA and MASCOT analyses showed similar substitution rate estimates (see below)  
388 to the non-randomised data set under a simple unstructured coalescent model. This confirmation of  
389 the presence of a temporal signal permitted further analyses using structured coalescent methods  
390 within BEAST2 (Firth et al. 2010).

### 391 **3.6 Structured coalescent analyses – BASTA and MASCOT.**

392 The three replicate BASTA and MASCOT chains converged to similar intra-method values across all  
393 parameters. Log-combined Data for derived parameters are shown in Table 3. Substitution rates are  
394 presented in Supplementary Figure S6B.

395 BASTA indicated a median substitution rate of 0.38 substitutions per genome per year (95% HPD  
396 interval 0.27-0.49). MASCOT indicated a similar rate of 0.34 substitutions per genome per year (95%  
397 HPD interval: 0.28-0.42).

398 BASTA and MASCOT estimates for median time to the most recent common ancestor (tMRCA) of the  
399 endemic lineage were 47.93 years (95% HPD 32.6-85.3) and 37.3 years (95% HPD 31.3-49.4) before  
400 the last date of sampling (in 2017), respectively - suggesting an emergence for endemic lineage 6.263  
401 in the late 1960s to early 1980s.

402 BASTA estimated the median badger-to-cattle interspecies transition rate to be 0.03 transitions per  
403 lineage per year (95% HPD interval: 0.00002-0.2039). In contrast, the cattle-to-badger median rate  
404 was approximately three times larger, at 0.098 transitions per lineage per year (95% HPD interval:  
405 0.0006-0.154) – see Figure 4A. MASCOT estimated badger-to-cattle transitions to be 0.86 transitions  
406 per lineage per year (95% HPD interval: 0.55-1.24), and cattle-to-badger median rate to be  
407 approximately three times larger, at 2.73 transitions per lineage per year (95% HPD interval: 0.53-  
408 5.83) – see Figure 4B.

409 Time stamped maximum clade credibility (MCC) trees for the BASTA and MASCOT analyses are  
410 presented in Supplementary Figures S7 and S8.

411 MASCOT-derived estimates of the *M. bovis* effective population size ( $N_e$ ) were also different between  
412 hosts, suggesting that the vast majority of pathogen diversity was found in cattle (median  $N_e = 465.76$ ;  
413 95% HPD: 118.13-1173.25) compared to badgers (median  $N_e = 1.98$ ; 95% HPD: 0.25-7.52) – see Figure  
414 4C.

415 BASTA-derived counts of intra- and inter-species transitions are discussed in the Supplementary  
416 Material and presented in Supplementary Figure S9.

### 417 **3.7 Graph methods – inter-species transitions.**

418 The *SeqTrack* analysis inferred the ancestry of the 302 *M. bovis* isolates by distinguishing  
419 (based on date of collection and genetic distances), ancestors from descendants (Figure 5). It  
420 identified 68 ancestors, of which 56 were associated with cattle and 12 with badgers. The  
421 number of cattle descendants was more than twice the number of badger ones ( $\mu=4.41$ ,  
422  $\sigma=8.44$  and  $\mu=1.93$ ,  $\sigma=1.89$ , respectively). The inferred ancestry displayed very few mutations  
423 between ancestors and descendants (maximum of 11 mutations with  $\mu=1.66$ ,  $\sigma=1.95$ )  
424 suggesting direct transmission links between isolates (Supplementary Fig S10). From these,  
425 71.8% were within cattle, 13.6% were from cattle to badgers, 10.3% were from badgers to  
426 cattle, and 4.3 % were within badgers (Supplementary Fig S11). Running the analysis with  
427 different substitution rate values did not influence these results (results not shown).

### 428 **3.8 Effect of badger population structure on *M. bovis* spatial partitioning.**

429 From the full model in the MRM analysis, modeling *M. bovis* genetic distance (SNP-based) as a function  
430 of inter badger genetic distance, inter badger Euclidean distance and inter *M. bovis* time of isolation  
431 difference, we observed that only inter-badger Euclidean distance was significantly associated with  
432 *M. bovis* genetic distance ( $p = 0.04$ ). However, the overall fit of the model was non-significant (F-test  
433  $p > 0.05$ ). Badger microsatellite derived genetic relatedness was therefore not associated with *M.*  
434 *bovis* SNP-derived genetic differentiation. A full summary of MRM findings is presented in  
435 Supplementary Table S2.

436

## 437 **4. Discussion**

438 We applied Bayesian phylogenetic methods to investigate transmission dynamics in a systematically  
439 sampled, multi-host, endemic disease. Our data shed further light on the intra- and interspecies  
440 dynamics of *M. bovis* transmission in an endemic area. They are also useful for informing control  
441 policies and comparison to epi-systems in different regions. From the latter, novel insights into drivers  
442 of disease transmission dynamics may come to light.

443 Our structured coalescent analyses suggest that the endemic 6.263 lineage has been present in the  
444 TVR zone since the 1960s-1980s. The rate of molecular evolution of 0.34 to 0.38 substitutions per  
445 genome per year is consistent with previous *M. bovis* phylodynamic studies – see Supplementary  
446 Table S3.

447 The presence of bacterial isolates from both cattle and badgers throughout all sub-lineages of the  
448 endemic 6.263 lineage indicates likely bi-directional transmission between both species. The  
449 structured coalescent BASTA and MASCOT models both suggest that infection in this region is driven  
450 primarily by cattle. Point estimates for transition rates from both analyses, and raw transition counts  
451 from BASTA do exhibit considerable uncertainty, however, when taken alongside additional data on  
452  $N_e$ , seqtrack outputs and badger genetic structure (see below), they are consistent with a reduced role

453 for badgers in this epi-system. While BASTA and MASCOT models had similar magnitudes of difference  
454 in inter-species transition rates and point to their same relative importance, point estimates of the  
455 transition rates were considerably different. This is perhaps not surprising, since while both are  
456 approximations of the structured coalescent, they make considerably different assumptions about  
457 how the coalescent process affects the shape of the phylogenetic tree from which transition rates are  
458 calculated (Müller et al. 2017). Estimates of raw transition counts both between- and within-hosts  
459 (see Supplementary material) are broadly congruent and point towards the study area being a  
460 primarily cattle-driven, epi-system. An important caveat when using Bayesian structured coalescent  
461 methodologies, is that transmission events and transitions are subtly different variables (Crispell et al.  
462 2019) – see the Supplementary Materials for some discussion on this and sampling  
463 representativeness.

464 Estimates of the effective population size from MASCOT models consistently indicated that most of  
465 the pathogen diversity is in cattle. The graph methods were largely in agreement with the  
466 reconstructed phylogenies, suggesting that the majority of bacterial ancestors were found in cattle  
467 hosts and that after within-cattle transmission events, transmissions from cattle to badgers were the  
468 main contributors to this epi-system. The graph methods complemented the phylogenetic analyses  
469 by their ability to infer correct genealogies of isolates in densely sampled areas such as this one. This  
470 method considers that ancestries can be inferred between sampled isolates within the given dataset  
471 following three assumptions: 1) each isolate can only have one ancestor; 2) ancestors must have an  
472 earlier collection date than their descendants; and 3) the likelihood of the ancestries can be indicated  
473 by the genetic differences among isolates. If any of these assumptions are violated, the method could  
474 provide wrong results, however, if this bias exists, it would also affect the graph-based and the  
475 phylogenetically analyses. The maximum number of SNP differences between isolates was 11, with a  
476 mean number of 1.66, suggesting that most (if not all) transmission events were direct. This result is  
477 not surprising since this study was performed in a small area in which an endemic lineage is present.  
478 However, it also highlights the quality of data sampling during the study period.

479 These independent lines of evidence suggest that the *M. bovis* strains found in badgers in the area  
480 represent a limited sample of the diversity found in the cattle *M. bovis* population, and likely result  
481 from recent cattle-to-badger transmission. Indeed, the raw transition count data (Supplementary  
482 Table S4 & Supplementary Figure S9) suggest that the number of cattle-to-badger transitions is  
483 approximately double that of badger-to-badger transitions, suggesting that spill-over events from  
484 cattle are having a greater impact on badger TB status than within-species transmission events.

485 Badger genetic population structure, whilst remaining stable over the intervention period, had no  
486 association with how *M. bovis* genetic diversity was spatially distributed. It is possible that this lack of  
487 association is due to factors other than reduced badger to badger intraspecies transmission dynamics.  
488 The endemic lineage, if it were a relatively recent incursion, may have had little time to establish foci  
489 of persistent infection in badgers, and diffuse across the landscape through philopatric contact  
490 networks. This lineage has, however, been present in the region for ~40-50 years, providing ample  
491 time for establishment to occur. Alternatively, perturbation of the badger population, and associated  
492 dispersal arising through the application of culling, even at a small-scale (Bielby et al. 2014), may have  
493 served to obscure any association between pathogen and host population structures. The relative  
494 stability of the IBD relationship we observe, and the fact that during the culling period of 2015-2018,  
495 genetic differentiation occurs over shorter distances than the survey-only year of 2014, are consistent  
496 with no perturbation signal. GPS collar data from badgers from this same region have also suggested  
497 badger ranging did not increase significantly in cull years compared to survey (O'Hagan et al 2021).  
498 Given these observations, and the results of the structured coalescent and graph methods, we

499 postulate that our badger genetic data further support the hypothesis of a relatively reduced role for  
500 badgers in bTB transmission and persistence in this region, compared to cattle.

501 Our data contrast starkly with the findings of Crispell et al (2019) from the Woodchester Park region  
502 of Gloucestershire, GB, that found badger-to-cattle transitions were up to nine times more common  
503 than cattle-to-badgers. Without employing detailed, comparative methods, it is difficult to definitively  
504 understand why transmission dynamics between the two regions are so divergent. However, it may  
505 be due to differences in host density and geography. The Woodchester Park badger population is one  
506 of the densest in Europe, with an average of 30-40 badgers per km<sup>2</sup> during the period covered by the  
507 recent phylodynamic study (Delahay et al. 2013; Crispell et al. 2019). The TVR region's badger  
508 population is approximately eight to ten times less dense than this - 3.88 badgers per km<sup>2</sup> from a  
509 County Down wide survey (Reid et al. 2012), and ~5.6 badgers per km<sup>2</sup> as assessed in the TVR study  
510 (Menzies et al. 2021), and more comparable to the average badger density observed in the UK  
511 Randomised Badger Culling Trial (RBCT - 3.92 badgers per km<sup>2</sup> (ISG, 2007)). Conversely, the cattle  
512 density in the immediate vicinity of Woodchester Park, in Gloucestershire, is quite variable with  
513 estimates ranging from 25-100 cattle per km<sup>2</sup> (APHA, 2017). Northern Ireland is recognised as having  
514 some of the highest cattle densities in western Europe with recent estimates suggesting an average  
515 of 112 cattle per km<sup>2</sup> (Allen et al. 2018). The landscapes are also geographically different, with the  
516 Irish landscape made up largely of pastureland interspersed with hedgerows that are the primary  
517 location for badger setts (Reid et al. 2012), while Woodchester Park consists of prime badger  
518 woodland habitat (Delahay et al. 2013).

519 Interestingly, the transmission dynamics we describe here are very similar to those reported by Rossi  
520 et al (2020b) in a recently introduced incursion of bTB into the low-risk area of Cumbria in northern  
521 GB. Specifically, they observed an initial phase of primarily cattle-to-cattle transmission, spilling over  
522 into local badgers. Whilst exact estimates of GB wide badger density are not available (Rossi et al.  
523 2020b), it is likely that density in Cumbria is considerably lower than that observed in Woodchester  
524 Park, and comparable to that observed in our study area - perhaps in the order of 0.3 to 2.5 badgers  
525 per km<sup>2</sup> (Judge et al. 2017). It is interesting that the transition counts between hosts are very similar  
526 given that the Cumbria outbreak has not persisted as long as the endemic situation in the TVR area.

527 Host density is a major driver of *M. bovis* persistence (Allen et al. 2018) and it is conceivable that the  
528 relative densities of cattle and badgers in different regions, alongside other factors, may affect  
529 transmission dynamics. The observed disparity between epi-systems suggests that there may be no  
530 simple bTB transmission paradigm on which to base all interventions. Such heterogeneity in regional  
531 disease epidemiology may well call for a more heterogeneous approach in the application of disease  
532 eradication schemes.

533 An important consideration from this study is that while our data are supportive of badgers playing a  
534 lesser role in intra-species bTB transmission dynamics in this region, this may not be capturing the full  
535 impact of badger-to-cattle transmission, which seeds new infection into herds. Subsequent within  
536 herd 'amplification' by cattle-to-cattle transmission may mean the initial seeding event has greater  
537 impact than that standalone event, results in an outsized contribution to disease spread, as has been  
538 postulated before from RBCT data. While the badger-to-cattle contribution was estimated at 5.7%,  
539 this was modelled to amplify to ~52% (bootstrap 95% CI: 9.1 – 100%), although confidence intervals  
540 were very wide (Donnelly and Nouvellet, 2013). Owing to the low rate of molecular evolution observed  
541 in *M. bovis*, the phylogenetic methods we employ lack the resolution over shorter outbreak time  
542 scales to identify such amplification events and inform on their impact.

543 Any study of a multi-host infectious disease system in the field will have biases that compromise the  
544 representativeness of the sample set assembled. However, we believe the systematic sampling  
545 undertaken here, and analytical approaches taken, largely mitigate these issues. See Supplementary  
546 materials for a full discussion.

547 A separate issue with our findings is that they come from a badger population undergoing selective  
548 culling and vaccination, both interventions that are likely to affect interspecies disease transmission  
549 dynamics (Buddle et al. 2018; ISG, 2007). However, any study seeking to harvest systematically  
550 sampled, culturable *M. bovis* from wildlife, would have involved disturbance and culling of badgers for  
551 post-mortem and pathogen isolation. The application of vaccination is admittedly a different matter  
552 however, and without the necessary non vaccinated control population in which to study transmission  
553 dynamics, we are unable to determine the likely impact of the 5 years of vaccination.

## 554 **Conclusions**

555 We describe how in a small region of Northern Ireland, cattle-associated transmission appears to drive  
556 bTB disease dynamics. Of the inter-species transitions estimated, cattle-to-badger transitions were  
557 three times more common than badger-to-cattle. We contrast this to the recently published work of  
558 Crispell et al. (2019) from Woodchester Park, in which starkly different transmission dynamics were  
559 observed. There may be regional heterogeneity in the epidemiology of bTB. Further work in other  
560 regions of the UK and Ireland is required to assess just how heterogeneous disease dynamics may be.  
561 If substantial heterogeneity is observed, it may be advisable for different regions to adopt bespoke  
562 eradication schemes tailored to the prevailing host dynamics in their areas, leading to superior control  
563 outcomes.

564

565

566

567

568

569

570

571

572

573

574

575

576

577

## 578 **Acknowledgments**

579 Assel Akhmetova is supported by a Bolashak International Scholarship. This work was funded by the  
580 Department of Agriculture, Environment and Rural Affairs for Northern Ireland (DAERA-NI) through its  
581 'Evidence and Innovation' programme – project no. 15/3/07. Additional funding was provided by the  
582 UK's Biotechnology and Biological Sciences Research Council (BBSRC) – grant numbers BB/P0105598  
583 and BB/M01262X. The funders had no role in study design, analysis or decision to publish. The authors  
584 wish to recognise Shane Collins and Carl McCormick and their team for supervising all field work and  
585 AFBI Disease Surveillance and Bacteriology teams who provided excellent post-mortem examinations  
586 and mycobacteriology support. Thanks to Dr Dez Delahay of the Animal and Plant Health Agency  
587 (APHA) in GB for advice on surveying local badger populations and trapping. Thanks to Dr Nicola  
588 Müller for her advice on the use of MASCOT and to Dr Nicola DeMaio for his advice on preparing XML  
589 files for BASTA.

## 590 **Research Ethics**

591 All badger field work was carried out under licences issued by the Northern Ireland Environment  
592 Agency. All scientific procedures performed on badgers were conducted according to the guidelines  
593 of the Animals Scientific Procedures Act (ASPA - Licence 2767) overseen by the Department of Health  
594 for Northern Ireland.

## 595 **Conflict of interest**

596 The authors declare no conflict of interest in the production of this work.

## 597 **Supplementary Files**

598 R scripts and BEAST xml run files used in the performance of this work are curated at the following  
599 GitHub repository:

600 [https://github.com/AdrianAllen1977/Genome-epidemiology-of-Mycobacterium-bovis-infection-in-](https://github.com/AdrianAllen1977/Genome-epidemiology-of-Mycobacterium-bovis-infection-in-contemporaneous-sympatric-badger-and-cattle)  
601 [contemporaneous-sympatric-badger-and-cattle](https://github.com/AdrianAllen1977/Genome-epidemiology-of-Mycobacterium-bovis-infection-in-contemporaneous-sympatric-badger-and-cattle)

602

603

604

605

606

607

608

609

610

611

## 612 Figures

1A

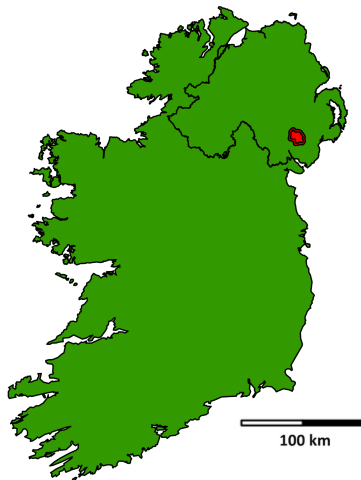

1B

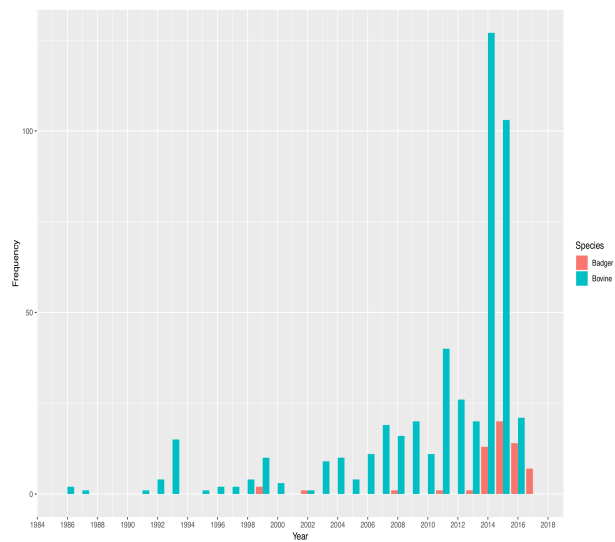

613  
614 **Figure 1** – A: Map of Ireland with location of 100 km<sup>2</sup> TVR cull zone highlighted in red. B: Frequency  
615 bar-plot of *Mycobacterium bovis* isolates sampled annually, from unique badgers and cattle, in the  
616 TVR zone prior to (1986-2013) and during the intervention (2014-2017).

617

618

619

620

621

622

623

624

625

626

627

628

629

630

631

632



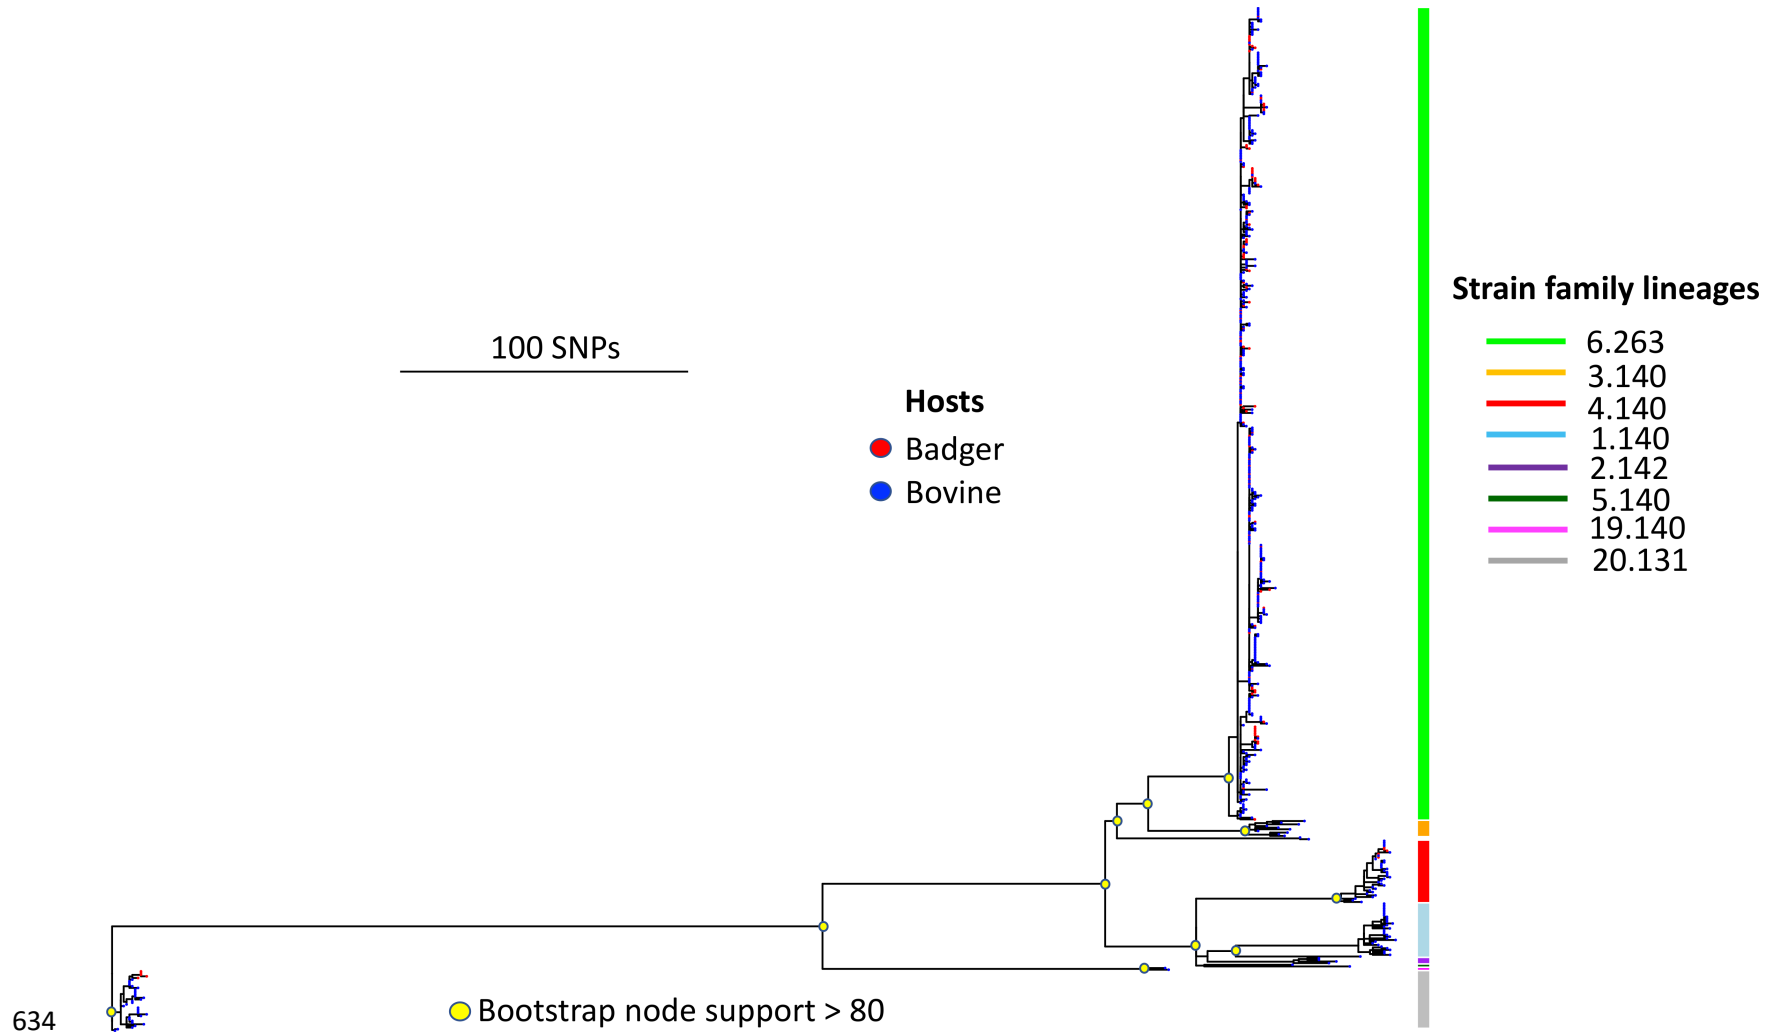

634

635

**Figure 2** – 1562 SNP Maximum Likelihood phylogeny of all 619 isolates that passed sequencing QA.

636

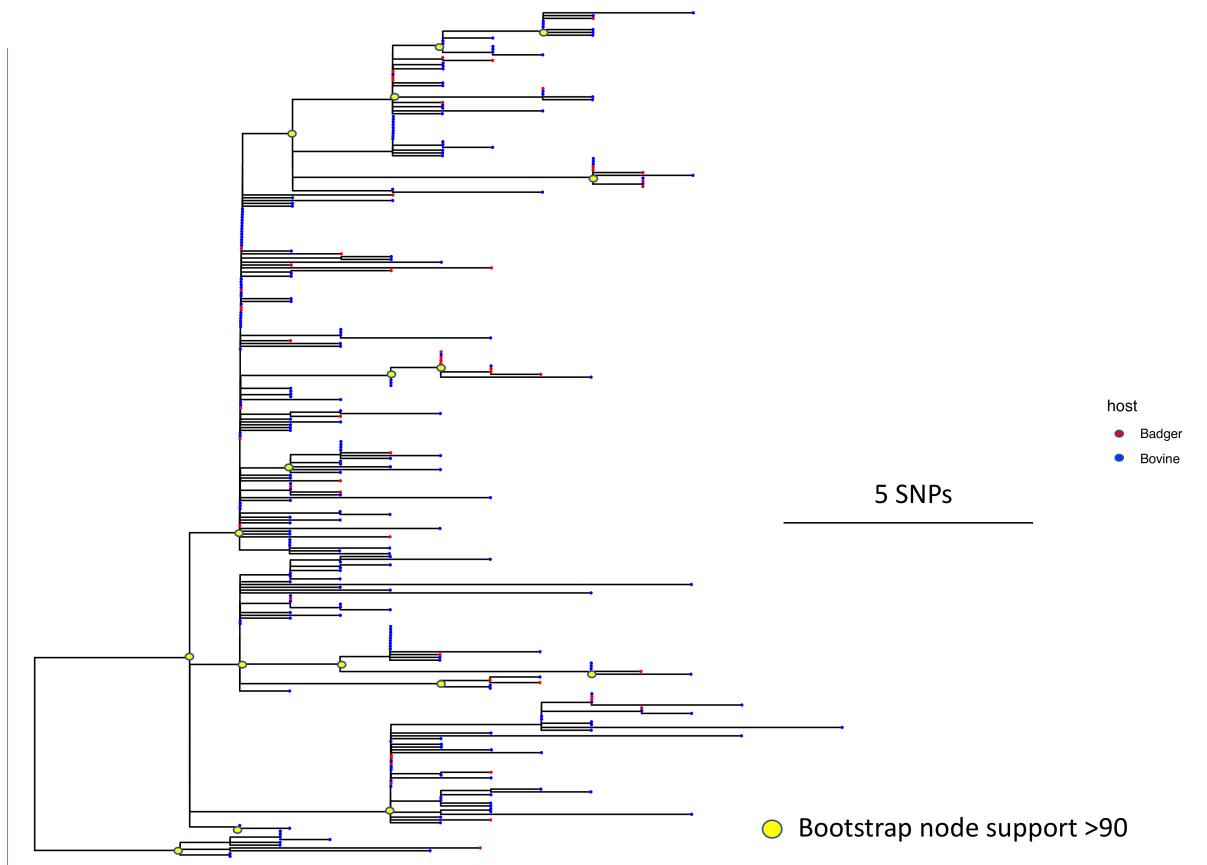

637

638 **Figure 3** – 377 SNP Maximum Likelihood phylogeny of 302 isolates from the 6.263 endemic lineage in  
639 the TVR zone. Tree rooted to AF2122/97 reference, but reference removed for aid of visualisation.

640

641

642

643

644

645

646

647

648

649

650

651

652

653

A

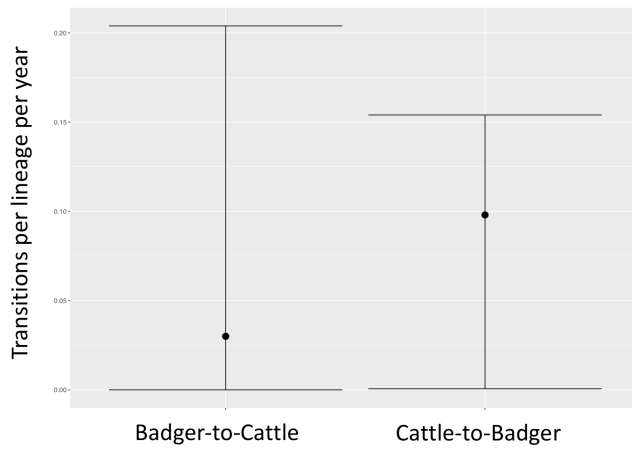

B

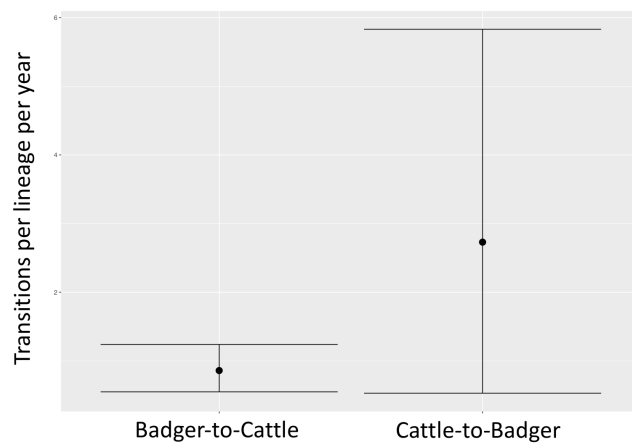

C

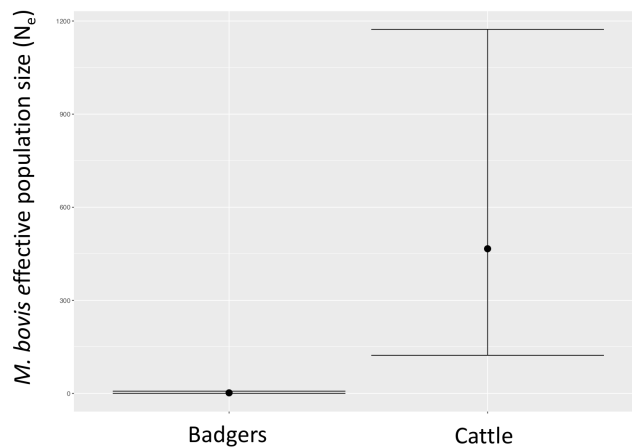

654

655 **Figure 4** – Logcombined interspecies pathogen transition rates as assessed by A: BASTA and B:  
656 MASCOT structured coalescent models. Transition rates are expressed as median transitions per  
657 lineage per year and 95% highest posterior density (HPD). C: Logcombined MASCOT inferred *M. bovis*  
658 effective population sizes in badgers and cattle and 95% highest posterior density (HPD).

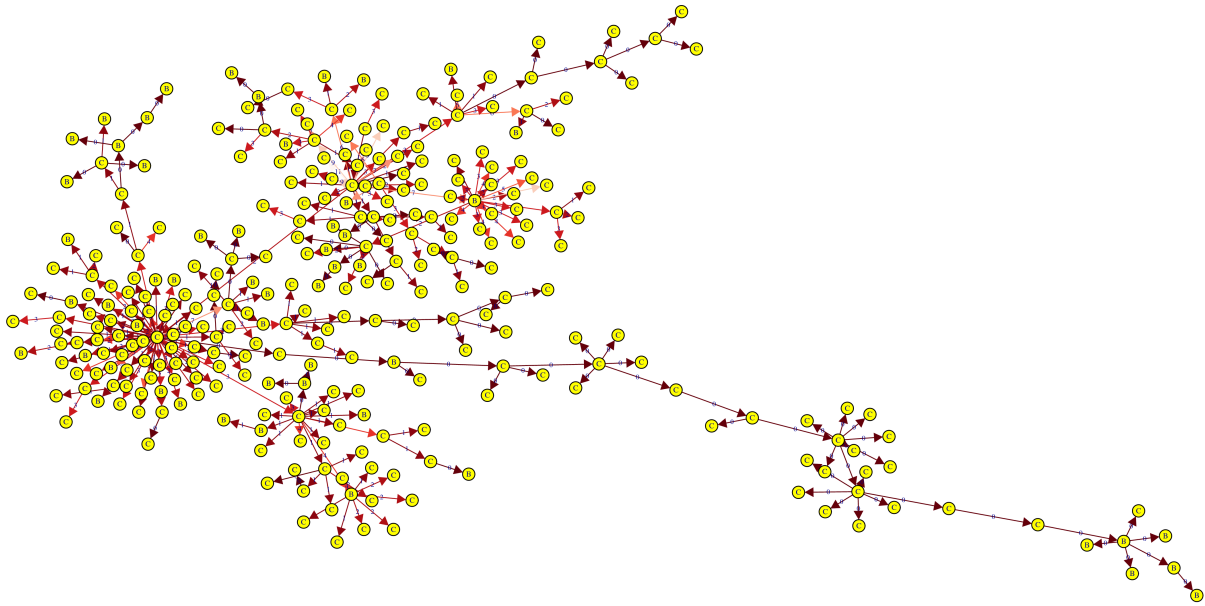

659

660 **Figure 5** - SeqTrack transmission tree of 302 *M. bovis* isolates collected from cattle and  
661 badgers. Nodes shown in yellow labelled as hosts (B for badgers, C for cattle), arrows  
662 delineate transmission direction (dark red = no/few mutations, light red = more mutations)  
663 with numbers of mutations between isolates shown in blue.

664

665

666

667

668

669

670

671

672

673

674

675

676

677

678

679

680

681 **Tables**

|          | <b>MLVA Strain families</b>    | <b>1.140</b> | <b>2.142</b> | <b>3.140</b> | <b>4.140</b> | <b>5.140</b> | <b>6.263</b> | <b>19.140</b> | <b>20.131</b> |
|----------|--------------------------------|--------------|--------------|--------------|--------------|--------------|--------------|---------------|---------------|
| <b>A</b> | <b>No. of isolates</b>         | 33           | 4            | 10           | 38           | 2            | 478          | 2             | 36            |
|          | <b>No. cattle isolates</b>     | 33           | 4            | 10           | 33           | 2            | 367          | 2             | 32            |
|          | <b>No. badger isolates</b>     | 0            | 0            | 0            | 5            | 0            | 111          | 0             | 4             |
| <b>B</b> | <b>No. SNPs in clade</b>       | 186          | 38           | 84           | 92           | 82           | 377          | 13            | 53            |
| <b>C</b> | <b>Min</b>                     | 0.0          | 8.0          | 8.0          | 0.0          | N/A          | 0.0          | N/A           | 0.0           |
|          | <b>1<sup>st</sup> Quartile</b> | 10.0         | 2.0          | 16.0         | 8.0          | N/A          | 5.0          | N/A           | 6.0           |
|          | <b>Median</b>                  | 15.0         | 20.5         | 21.0         | 12.0         | N/A          | 7.0          | N/A           | 8.0           |
|          | <b>Mean</b>                    | 17.6         | 19.5         | 21.6         | 11.7         | N/A          | 7.6          | N/A           | 8.0           |
|          | <b>3<sup>rd</sup> Quartile</b> | 19.0         | 21.0         | 27.0         | 15.0         | N/A          | 10.0         | N/A           | 11.0          |
|          | <b>Max</b>                     | 96.0         | 27.0         | 34.0         | 28.0         | 79.0         | 25.0         | 13.0          | 18.0          |
|          | <b>St. Dev</b>                 | 20.0         | 6.2          | 7.3          | 6.3          | N/A          | 4.0          | N/A           | 3.8           |

682 **Table 1** – A. number of isolates per strain family sampled in the study area with breakdown of  
 683 number of isolates per host species. B. number of SNPs detected in strain family clades, and C.  
 684 pairwise SNP distance statistics for each of the eight major lineages of *M. bovis* found in the TVR  
 685 zone.

686

687

688

689

690

691

692

693

694

695

696

697

| Cohort genotyped | No. animals | Mantel test Pearson coefficient r | Mantel p value | Linear model beta    | Linear model p value    | R <sup>2</sup> | 1 unit differentiation per x km distance |
|------------------|-------------|-----------------------------------|----------------|----------------------|-------------------------|----------------|------------------------------------------|
| <b>2014</b>      | 273         | 0.11                              | 0.0001         | 1.6x10 <sup>-4</sup> | <2x10 <sup>-16</sup>    | 0.012          | 6.25 km                                  |
| <b>2015</b>      | 152         | 0.16                              | 0.0001         | 2.1x10 <sup>-4</sup> | <2x10 <sup>-16*</sup>   | 0.024          | 4.74 km                                  |
| <b>2016</b>      | 97          | 0.17                              | 0.0001         | 2.6x10 <sup>-4</sup> | <2x10 <sup>-16**</sup>  | 0.030          | 3.84 km                                  |
| <b>2017</b>      | 113         | 0.11                              | 0.0001         | 1.5x10 <sup>-4</sup> | <2x10 <sup>-16</sup>    | 0.011          | 6.67 km                                  |
| <b>2018</b>      | 134         | 0.13                              | 0.0004         | 1.7x10 <sup>-4</sup> | <2x10 <sup>-16***</sup> | 0.017          | 5.88 km                                  |
| <b>TB +ve</b>    | 45          | 0.16                              | 0.0024         | 3.1x10 <sup>-4</sup> | 1.1x10 <sup>-7</sup>    | 0.030          | 3.22 km                                  |

698 **Table 2** – Badger meta population isolation by distance (IBD) relationship for all sampling years. \*  
 699 =2015 significantly difference than slopes for years 2014, 2016 and 2017. \*\* = 2016 slope  
 700 significantly different than slopes for years 2014 and 2015. \*\*\*=2018 slope significantly different  
 701 than slopes for years 2014 and 2017.

702  
703  
704  
705  
706  
707  
708  
709  
710  
711  
712  
713  
714  
715  
716  
717  
718  
719

|               | <b>Substitution rate</b> | <b>tMRCA</b>        | <b>Badger <i>M. bovis</i> Ne</b> | <b>Cattle <i>M. bovis</i> Ne</b> | <b>Cattle to badger transition rate</b> | <b>Badger to cattle transition rate</b> |
|---------------|--------------------------|---------------------|----------------------------------|----------------------------------|-----------------------------------------|-----------------------------------------|
| <b>BASTA</b>  | 0.38 (0.27-0.49)         | 47.93 (32.64-85.34) | N/A                              | N/A                              | 0.098 (0.0006-0.154)                    | 0.030 (0.000002-0.2039)                 |
| <b>MASCOT</b> | 0.34 (0.28-0.42)         | 37.30 (31.28-49.39) | 1.97 (0.26-7.39)                 | 466.19 (122.94-1172.92)          | 2.73 (0.53-5.83)                        | 0.86 (0.55-1.24)                        |

720

721 **Table 3** – Summary statistics for log-combined triplicate BASTA and MASCOT models. All estimates  
722 are median and 95% highest posterior density (HPD). Substitution rate is expressed as sites per  
723 genome, per year. Transition rates are expressed as transitions per lineage per year. Time to most  
724 recent common ancestor (tMRCA) for the endemic 6.263 clade is expressed in years prior to the last  
725 sampling date, 2017.

726

727

728

729

730

731

732

733

734

735

736

737

738

739

740

741

742

## 743 **References**

- 744 Abernethy DA, Denny GO, Menzies FD, McGuckian P, Honhold N, Roberts AR (2006) The Northern  
745 Ireland programme for the control and eradication of *Mycobacterium bovis*. *Vet Microbiol* 112(2-4):  
746 231-237.
- 747 Adamack AT, Gruber B (2014) PopGenReport : simplifying basic population genetic analyses in R.  
748 *Methods Ecol Evol* 5(4): 384-387.
- 749 Allen AR, Dale J, McCormick C, Mallon TR, Costello E, Gordon SV et al (2013) The phylogeny and  
750 population structure of *Mycobacterium bovis* in the British Isles. *Infect Genet Evol* 20: 8-15.
- 751 Allen AR, Skuce RA, Byrne AW (2018) Bovine Tuberculosis in Britain and Ireland - A Perfect Storm?  
752 the Confluence of Potential Ecological and Epidemiological Impediments to Controlling a Chronic  
753 Infectious Disease. *Front Vet Sci* 5: 109.
- 754 APHA (2017) Livestock Demographic Data Group: Cattle population report. Animal and Plant Health  
755 Agency, United Kingdom. [http://apha.defra.gov.uk/documents/surveillance/diseases/lddg-pop-](http://apha.defra.gov.uk/documents/surveillance/diseases/lddg-pop-report-cattle1117.pdf)  
756 [report-cattle1117.pdf](http://apha.defra.gov.uk/documents/surveillance/diseases/lddg-pop-report-cattle1117.pdf)
- 757 Arnold ME, Courcier EA, Stringer LA, McCormick CM, Pascual-Linaza AV, Collins SF et al (2021) A  
758 Bayesian analysis of a Test and Vaccinate or Remove study to control bovine tuberculosis in badgers  
759 (*Meles meles*). *PLoS One* 16(1): e0246141.
- 760 Barido-Sottani J, Bošková V, Plessis LD, Kühnert D, Magnus C, Mitov V et al (2018) Taming the BEAST-  
761 A Community Teaching Material Resource for BEAST 2. *Syst Biol* 67(1): 170-174.
- 762 Biek R, O'Hare A, Wright D, Mallon T, McCormick C, Orton RJ et al (2012) Whole Genome Sequencing  
763 Reveals Local Transmission Patterns of *Mycobacterium bovis* in Sympatric Cattle and Badger  
764 Populations. *PLoS Pathog* 8(11): e1003008.
- 765 Biek R, Pybus OG, Lloyd-Smith JO, Didelot X (2015) Measurably evolving pathogens in the genomic  
766 era. *Trends Ecol Evol* 30(6): 306-313.
- 767 Biek R, Real LA (2010) The landscape genetics of infectious disease emergence and spread. *Mol Ecol*  
768 19(17): 3515-3531.
- 769 Bielby J, Donnelly CA, Pope LC, Burke T, Woodroffe R (2014) Badger responses to small-scale culling  
770 may compromise targeted control of bovine tuberculosis. *Proc Nat Acad Sci USA* 111(25): 9193-9198.
- 771 Bouckaert R, Heled J, Kühnert D, Vaughan T, Wu CH, Xie D et al (2014) BEAST 2: a software platform  
772 for Bayesian evolutionary analysis. *PLoS Comp Biol* 10(4): e1003537.
- 773 Buddle BM, Vordermeier HM, Chambers MA, de Klerk-Lorist LM (2018) Efficacy and Safety of BCG  
774 Vaccine for Control of Tuberculosis in Domestic Livestock and Wildlife. *Front Vet Sci* 5: 259.
- 775 Chambers MA, Waterhouse S, Lyashchenko K, Delahay R, Sayers R, Hewinson RG (2009)  
776 Performance of TB immunodiagnostic tests in Eurasian badgers (*Meles meles*) of different ages and  
777 the influence of duration of infection on serological sensitivity. *BMC Vet Res* 5: 42.
- 778 Courcier EA, Menzies FD, Strain SAJ, Skuce RA, Robinson PA, Patterson IAP et al (2018) Monitoring  
779 *Mycobacterium bovis* in Eurasian badgers (*Meles meles*) killed by vehicles in Northern Ireland  
780 between 1998 and 2011. *Vet Rec* 182(9): 259.



- 781 Courcier EA, Pascual-Linaza AV, Arnold ME, McCormick CM, Corbett DM, O'Hagan MJH et al (2020)  
782 Evaluating the application of the dual path platform VetTB test for badgers (*Meles meles*) in the test  
783 and vaccinate or remove (TVR) wildlife research intervention project in Northern Ireland. Res Vet Sci  
784 130: 170-178.
- 785 Crispell J, Benton CH, Balaz D, De Maio N, Ahkmetova A, Allen A et al (2019) Combining genomics  
786 and epidemiology to analyse bi-directional transmission of *Mycobacterium bovis* in a multi-host  
787 system. Elife 8.
- 788 Crispell J, Cassidy S, Kenny K, McGrath G, Warde S, Cameron H et al (2020) *Mycobacterium bovis*  
789 genomics reveals transmission of infection between cattle and deer in Ireland. Microb Genom 6(8).
- 790 Crispell J, Zadoks RN, Harris SR, Paterson B, Collins DM, de-Lisle GW et al (2017) Using whole genome  
791 sequencing to investigate transmission in a multi-host system: bovine tuberculosis in New Zealand.  
792 BMC Genomics 18(1): 180.
- 793 DAERA. (2018) Test and vaccinate or remove (TVR) wildlife intervention research.  
794 [https://www.daera-ni.gov.uk/articles/test-and-vaccinate-or-remove-tvr-wildlife-intervention-](https://www.daera-ni.gov.uk/articles/test-and-vaccinate-or-remove-tvr-wildlife-intervention-research)  
795 [research](https://www.daera-ni.gov.uk/articles/test-and-vaccinate-or-remove-tvr-wildlife-intervention-research)
- 796 De Maio N, Wu CH, O'Reilly KM, Wilson D (2015) New Routes to Phylogeography: A Bayesian  
797 Structured Coalescent Approximation. PLoS Genet 11(8): e1005421.
- 798 Delahay RJ, Walker N, Smith GC, Wilkinson D, Clifton-Hadley RS, Cheeseman CL et al (2013) Long-  
799 term temporal trends and estimated transmission rates for *Mycobacterium bovis* infection in an  
800 undisturbed high-density badger (*Meles meles*) population. Epidemiol Infect 141(7): 1445-1456.
- 801 Donnelly CA, Nouvellet P (2013) The contribution of badgers to confirmed tuberculosis in cattle in  
802 high-incidence areas in England. PLoS Currents Outbreaks 5.
- 803 Dray S, Dufour A (2007) The ade4 Package: Implementing the Duality Diagram for Ecologists. J Stat  
804 Software 22: 1-20.
- 805 Edwards D, Pope B, Holt K (2016) RedDog mapping based phylogenomics pipeline.  
806 <https://github.com/katholt/RedDog>
- 807 European Council. (1964) "Council Directive 64/432/EEC". Off J Eur Comm.
- 808 Firth C, Kitchen A, Shapiro B, Suchard MA, Holmes EC, Rambaut A (2010) Using time-structured data  
809 to estimate evolutionary rates of double-stranded DNA viruses. Mol Biol Evol 27(9): 2038-2051.
- 810 Godfray C, Donnelly C, Hewinson RG, Winter M, Wood J (2018) Bovine TB strategy review. DEFRA  
811 [https://www.gov.uk/government/publications/a-strategy-for-achieving-bovine-tuberculosis-free-](https://www.gov.uk/government/publications/a-strategy-for-achieving-bovine-tuberculosis-free-status-for-england-2018-review)  
812 [status-for-england-2018-review](https://www.gov.uk/government/publications/a-strategy-for-achieving-bovine-tuberculosis-free-status-for-england-2018-review)
- 813 Goslee SC, Urban DL (2007) The ecodist package for dissimilarity-based analysis of ecological data. J  
814 Stat Software 22(7): 1-19.
- 815 Guerrero J, Byrne AW, Lavery J, Presho E, Kelly G, Courcier EA et al (2018) The population and  
816 landscape genetics of the European badger (*Meles meles*) in Ireland. Ecol Evol 8(20): 10233-10246.
- 817 Harris SR, Cartwright EJ, Torok ME, Holden MT, Brown NM, Ogilvy-Stuart AL et al (2013) Whole-  
818 genome sequencing for analysis of an outbreak of meticillin-resistant *Staphylococcus aureus*: a  
819 descriptive study. Lancet Infect Dis 13(2): 130-136.

- 820 Hijmans RJ, Williams, E., Vennes C. (2019) Geosphere: Spherical trigonometry for geographic  
821 applications. <https://cran.r-project.org/web/packages/geosphere/index.html>
- 822 ISG - Independent Scientific Group on Cattle TB (2007) DEFRA London.  
823 [http://www.bovinetb.info/docs/final\\_report.pdf](http://www.bovinetb.info/docs/final_report.pdf)
- 824 Jombart T, Ahmed I (2011) adegenet 1.3-1: new tools for the analysis of genome-wide SNP data.  
825 *Bioinformatics* 27(21): 3070-3071.
- 826 Jombart T, Eggo RM, Dodd PJ, Balloux F (2011) Reconstructing disease outbreaks from genetic data:  
827 a graph approach. *Heredity* 106(2): 383-390.
- 828 Judge J, Wilson GJ, Macarthur R, McDonald RA, Delahay RJ (2017) Abundance of badgers (*Meles*  
829 *meles*) in England and Wales. *Sci Reports* 7(1): 276.
- 830 Kamerbeek J, Schouls L, Kolk A, van Agterveld M, van Soolingen D, Kuijper S et al (1997)  
831 Simultaneous detection and strain differentiation of *Mycobacterium tuberculosis* for diagnosis and  
832 epidemiology. *J Clin Microbiol* 35(4): 907-914.
- 833 Kao RR, Price-Carter M, Robbe-Austerman S (2016) Use of genomics to track bovine tuberculosis  
834 transmission. *Revue Sci Tech* 35(1): 241-258.
- 835 Langmead B, Salzberg SL (2012) Fast gapped-read alignment with Bowtie 2. *Nature Methods* 9(4):  
836 357-359.
- 837 Li H, Handsaker B, Wysoker A, Fennell T, Ruan J, Homer N et al (2009) The Sequence Alignment/Map  
838 format and SAMtools. *Bioinformatics* 25(16): 2078-2079.
- 839 Malone KM, Farrell D, Stuber TP, Schubert OT, Aebersold R, Robbe-Austerman S et al (2017)  
840 Updated Reference Genome Sequence and Annotation of *Mycobacterium bovis* AF2122/97. *Genome*  
841 *Announc* 5(14).
- 842 Meehan CJ, Moris P, Kohl TA, Pečerska J, Akter S, Merker M et al (2018) The relationship between  
843 transmission time and clustering methods in *Mycobacterium tuberculosis* epidemiology.  
844 *EBioMedicine* 37: 410-416.
- 845 Mellmann A, Harmsen D, Cummings CA, Zentz EB, Leopold SR, Rico A et al (2011) Prospective  
846 Genomic Characterization of the German Enterohemorrhagic *Escherichia coli* O104:H4 Outbreak by  
847 Rapid Next Generation Sequencing Technology. *PLoS ONE* 6(7): e22751.
- 848 Menardo F, Duchêne S, Brites D, Gagneux S (2019) The molecular clock of *Mycobacterium*  
849 *tuberculosis*. *PLoS Pathog* 15(9): e1008067.
- 850 Menzies FD, McCormick, C.M., O'Hagan, M.J.H., Collins, S.F., McEwan, J., McGeown, C.F. et al (2021)  
851 Test and vaccinate or remove: methodology and preliminary results from a badger intervention  
852 research project. *Vet Rec* - Accepted.
- 853 Milne GM, Graham J, Allen A, Lahuerta-Marin A, McCormick C, Presho E et al (2019) Spatiotemporal  
854 analysis of prolonged and recurrent bovine tuberculosis breakdowns in Northern Irish cattle herds  
855 reveals a new infection hotspot. *Spat Spatiotemporal Epidemiol* 28: 33-42.
- 856 Milne MG, Graham J, Allen A, McCormick C, Presho E, Skuce R et al (2019) Variation in  
857 *Mycobacterium bovis* genetic richness suggests that inwards cattle movements are a more  
858 important source of infection in beef herds than in dairy herds. *BMC Microbiol* 19(1): 154.

- 859 Müller NF, Rasmussen D, Stadler T (2018) MASCOT: parameter and state inference under the  
860 marginal structured coalescent approximation. *Bioinformatics* 34(22): 3843-3848.
- 861 Müller NF, Rasmussen DA, Stadler T (2017) The Structured Coalescent and Its Approximations. *Mol*  
862 *Biol Evol* 34(11): 2970-2981.
- 863 Northern Ireland Audit Office. (2018) Bovine Tuberculosis Report. <http://www.niauditoffice.gov.uk>
- 864 O'Hagan M, Gordon, A., McCormick, C., Collins, S., Trimble, N., McGeown, C. et al (2021) The effect  
865 of ranging behaviour after selective removal of bovine tuberculosis test positive badgers (*Meles*  
866 *meles*) using a test and vaccinate or remove intervention in Northern Ireland. In review.
- 867 Paradis E, Schliep K (2019) ape 5.0: an environment for modern phylogenetics and evolutionary  
868 analyses in R. *Bioinformatics* 35(3): 526-528.
- 869 Parish T, Stoker, N.G. (2001) *Mycobacterium tuberculosis* protocols. Humana Press.
- 870 Rambaut A (2018) Figtree v1.4.4. <https://github.com/rambaut/figtree/releases>
- 871 Rambaut A, Drummond AJ, Xie D, Baele G, Suchard MA (2018) Posterior Summarization in Bayesian  
872 Phylogenetics Using Tracer 1.7. *Syst Biol* 67(5): 901-904.
- 873 Rambaut A, Lam TT, Max Carvalho L, Pybus OG (2016) Exploring the temporal structure of  
874 heterochronous sequences using TempEst (formerly Path-O-Gen). *Virus evol* 2(1): vew007.
- 875 Reid N, Etherington TR, Wilson GJ, Montgomery WI, McDonald RA (2012) Monitoring and population  
876 estimation of the European badger *Meles meles* in Northern Ireland. *Wildlife Biol* 18(1): 46-57.
- 877 Rieux A, Khatchikian CE (2017) tipdatingbeast: an r package to assist the implementation of  
878 phylogenetic tip-dating tests using beast. *Mol Ecol Res* 17(4): 608-613.
- 879 Rossi G, Crispell J, Balaz D, Lycett SJ, Benton CH, Delahay RJ et al (2020a) Identifying likely  
880 transmissions in *Mycobacterium bovis* infected populations of cattle and badgers using the  
881 Kolmogorov Forward Equations. *Sci Reports* 10(1): 21980.
- 882 Rossi G, Crispell, J., Brough, T., Lycett, S.J., White, P.C.L., Allen, A. et al (2020b) Phylodynamic analysis  
883 of an emergent *Mycobacterium bovis* outbreak in an area with no previously known wildlife  
884 infections. bioRxiv. 2020.11.12.379297; doi: <https://doi.org/10.1101/2020.11.12.379297>
- 885 Salvador LCM, O'Brien DJ, Cosgrove MK, Stuber TP, Schooley AM, Crispell J et al (2019) Disease  
886 management at the wildlife-livestock interface: Using whole-genome sequencing to study the role of  
887 elk in *Mycobacterium bovis* transmission in Michigan, USA. *Mol Ecol* 28(9): 2192-2205.
- 888 Schliep KP (2011) phangorn: phylogenetic analysis in R. *Bioinformatics* 27(4): 592-593.
- 889 Skuce R, Breadon E, Allen A, Milne G, McCormick C, Hughes C et al (2020) Longitudinal dynamics of  
890 herd-level *Mycobacterium bovis* MLVA type surveillance in cattle in Northern Ireland 2003-2016.  
891 *Infect Genet Evol* 79: 104131.
- 892 Skuce RA, Mallon TR, McCormick CM, McBride SH, Clarke G, Thompson A et al (2010)  
893 *Mycobacterium bovis* genotypes in Northern Ireland: herd level surveillance (2003 to 2008). *Vet Rec*  
894 167(18): 684-689.  
895

- 896 Skuce RA, McDowell SW, Mallon TR, Luke B, Breadon EL, Lagan PL et al (2005). Discrimination of  
897 isolates of *Mycobacterium bovis* in Northern Ireland on the basis of variable numbers of tandem  
898 repeats (VNTRs). *Vet Rec* 157(17): 501-504.
- 899 Smith NH, Upton P (2012) Naming spoligotype patterns for the RD9-deleted lineage of the  
900 *Mycobacterium tuberculosis* complex; [www.Mbovis.org](http://www.Mbovis.org). *Infect Genet Evol* 12(4): 873-876.
- 901 Stamatakis A (2014) RAxML version 8: a tool for phylogenetic analysis and post-analysis of large  
902 phylogenies. *Bioinformatics* 30(9): 1312-1313.
- 903 R Development Core Team. (2020) R Foundation for Statistical Computing, Vienna, Austria.
- 904 Trewby H (2016a) The genetic and spatial epidemiology of bovine tuberculosis in the UK: from  
905 molecular typing to bacterial whole genome sequencing. PhD thesis, University of Glasgow.
- 906 Trewby H, Wright D, Breadon EL, Lycett SJ, Mallon TR, McCormick C et al (2016b) Use of bacterial  
907 whole-genome sequencing to investigate local persistence and spread in bovine tuberculosis.  
908 *Epidemics* 14: 26-35.
- 909 van Soolingen D, de Haas PE, Kremer K (2001) Restriction fragment length polymorphism typing of  
910 mycobacteria. *Methods Mol Med* 54: 165-203.
- 911 Vaughan TG, Kühnert D, Poppinga A, Welch D, Drummond AJ (2014) Efficient Bayesian inference  
912 under the structured coalescent. *Bioinformatics* 30(16): 2272-2279.
- 913 Volz EM, Kosakovsky Pond SL, Ward MJ, Leigh Brown AJ, Frost SDW (2009) Phylodynamics of  
914 Infectious Disease Epidemics. *Genetics* 183(4): 1421-1430.
- 915 Walker TM, Ip CL, Harrell RH, Evans JT, Kapatai G, Dedicoat MJ et al (2013) Whole-genome  
916 sequencing to delineate *Mycobacterium tuberculosis* outbreaks: a retrospective observational study.  
917 *Lancet Infect Dis* 13(2): 137-146.
- 918 Wright S (1943) Isolation by Distance. *Genetics* 28(2): 114-138.
- 919 Yu G. (2020) ggtree: Elegant Graphics for Phylogenetic Tree Visualization and Annotation.  
920 <https://guangchuangyu.github.io/ggtree-book/short-introduction-to-r.html>
- 921
